# Supplementary material
Source: HighWire-hosted journal article supplement (https://bjo.bmj.com/content/107/10/1472)
Supplement: inline-supplementary-material-1 [file inline-supplementary-material-1.pdf]

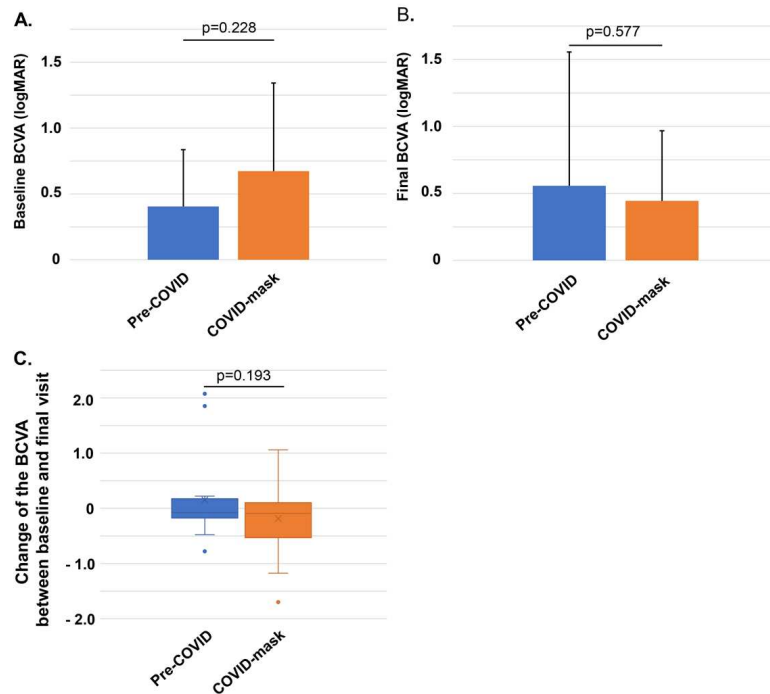

**online supplemental figure S1: Baseline and final best-corrected visual acuity (BCVA) in pre-COVID and COVID-mask period.**

Baseline and final BCVA of post-vitreotomy endophthalmitis in pre-COVID and COVID-mask periods were compared. Baseline BCVA (A), final BCVA (B), and the change of the BCVA between final and baseline BCVA (C) were not significantly different in the pre-COVID and during COVID-mask period.
