# Supplementary material
Source: HighWire-hosted journal article supplement (https://bjo.bmj.com/content/107/10/1472)
Supplement: inline-supplementary-material-2 [file inline-supplementary-material-2.pdf]

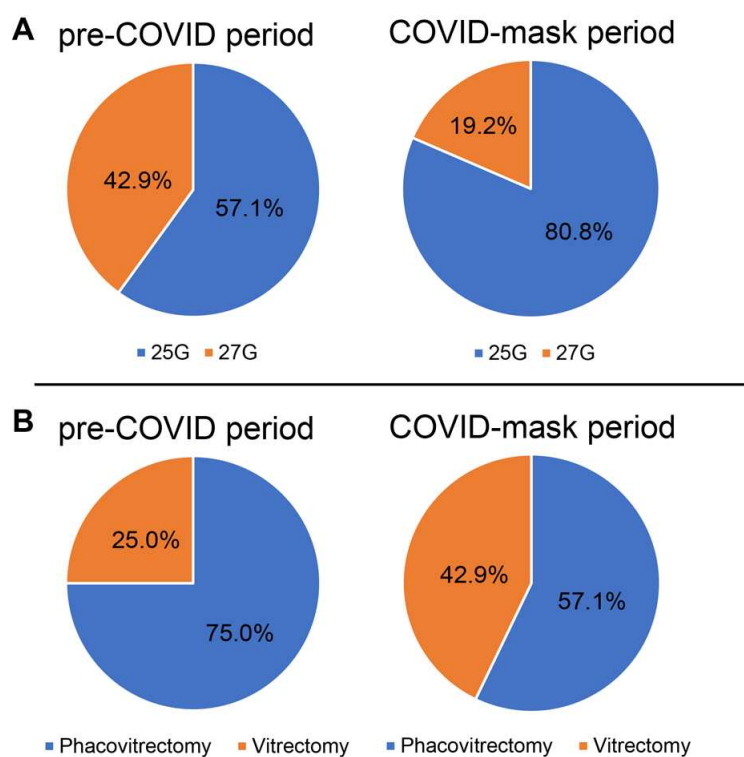

**online supplemental figure S2: Breakdown of vitrectomy in the pre-COVID and COVID-mask periods: the size of vitrectomy probes and the vitrectomy alone/phacovitrectomy.**

There was a tendency for more endophthalmitis cases in the COVID-mask period that had undergone 25G vitrectomy (A) and more vitrectomy procedures alone (B), but it did not reach statistical significance.
